# Supplementary material for: Antiproliferative effects of two gold(I)-N-heterocyclic carbene complexes in A2780 human ovarian cancer cells: a comparative proteomic study
Source: PubMed Central journal article supplement (PMC6021324; doi:10.18632/oncotarget.25556), 2018-06-15
Supplement: oncotarget-09-28042-s001.pdf [file oncotarget-09-28042-s001.pdf]

## Antiproliferative effects of two gold(I)-N-heterocyclic carbene complexes in A2780 human ovarian cancer cells: a comparative proteomic study

### SUPPLEMENTARY MATERIALS

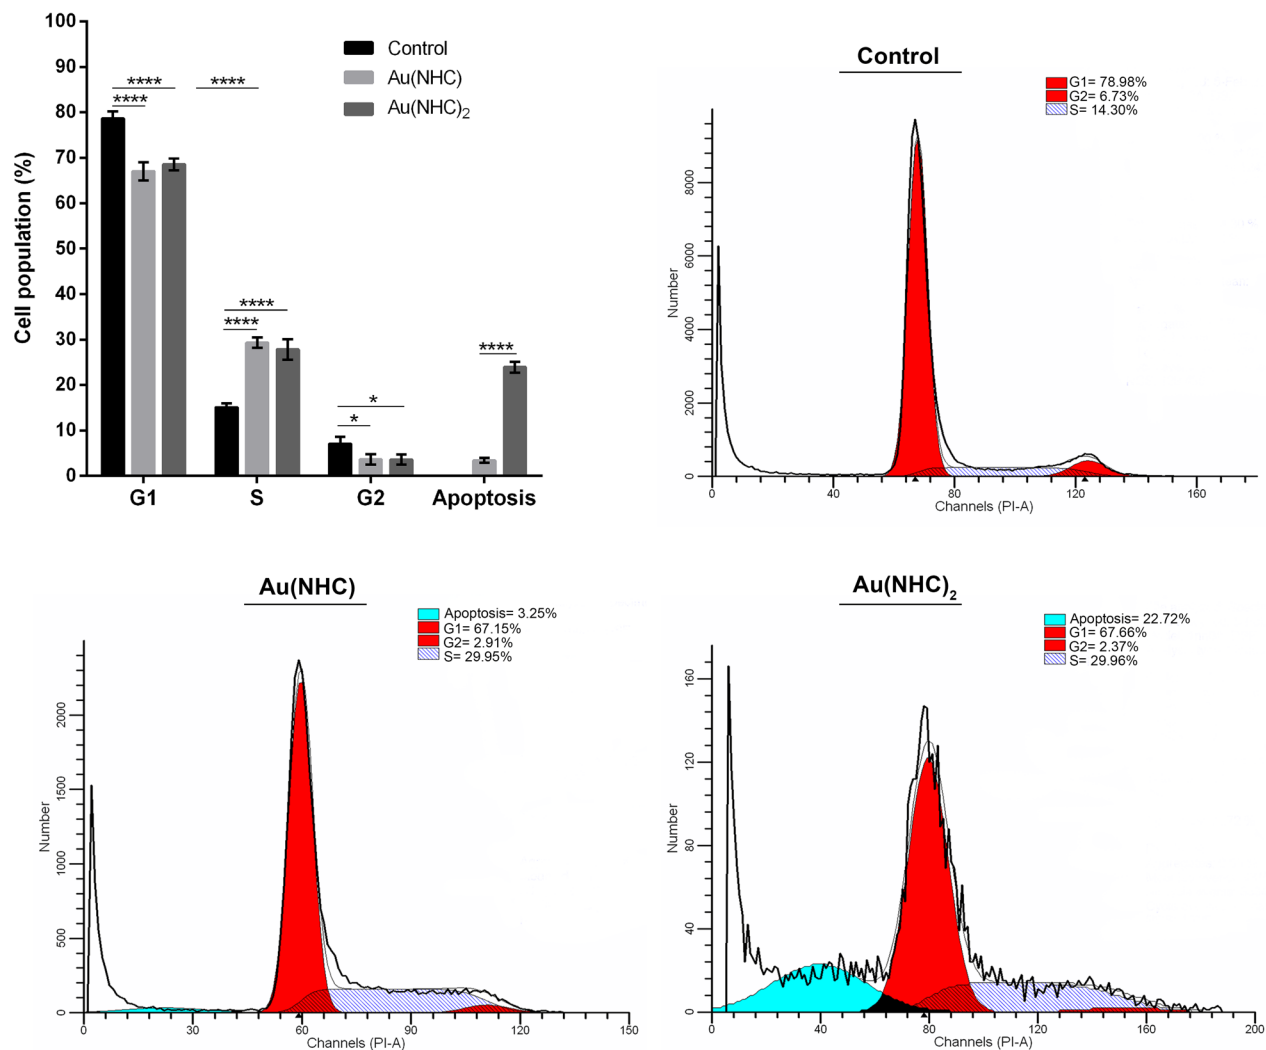

**Supplementary Figure 1: Cell cycle distribution after 72 h of gold(I)-N-heterocyclic carbene treatment.** Cell cycle distribution of A2780 cell line was assessed by flow cytometric analysis. Histogram reports the cell percentage in G1, S and G2 phase of cell cycle after 72 h of treatment with the 72 h-exposure IC<sub>50</sub>-dose of Au(NHC) and Au(NHC)<sub>2</sub>. Flow cytometric images are representative of three independent experiments. Results are reported as mean ± SD. The statistical analysis was carried out using one-way ANOVA test followed by Tuckey's multiple comparisons test using Graphpad Prism v 6.0 (\*p<0.05, \*\*\*\*p<0.0001).

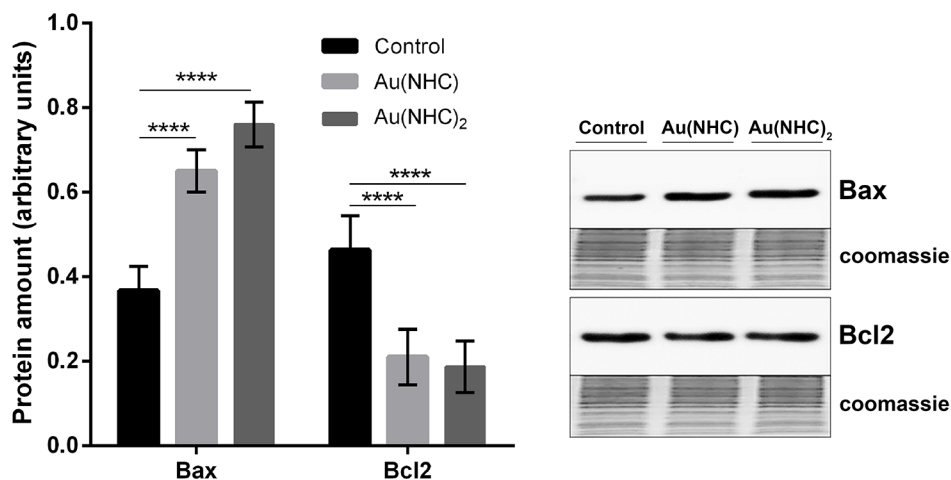

**Supplementary Figure 2: Apoptosis induction by Au(NHC) and Au(NHC)<sub>2</sub> in A2780 cell line.** A2780 cells were treated with Au(NHC) and Au(NHC)<sub>2</sub> for 72 h with their 72 h-exposure IC<sub>50</sub>-dose and apoptosis induction was confirmed by western blot analysis of pro-apoptotic Bax and anti-apoptotic Bcl2 level. Representative Immunoblots are shown together with the corresponding Coomassie-stained PVDF membranes. All the experiments were performed in triplicate. Histogram reports normalized mean relative-integrated-density ± SD values of the Bax and Bcl2 bands. The statistical analysis was carried out using one-way ANOVA test followed by Tuckey's multiple comparisons test using Graphpad Prism v 6.0 (\*\*\*\*p<0.0001). In detail, western blot analysis pointed out an increment in Bax level of about 2.7-fold upon Au(NHC) exposure and, of about 2.8-fold upon Au(NHC)<sub>2</sub> exposure. Conversely, the Bcl2 level was decreased of about 2-fold in monocarbene-treated cells and of about 2.5-fold in dicarbene treated cells.

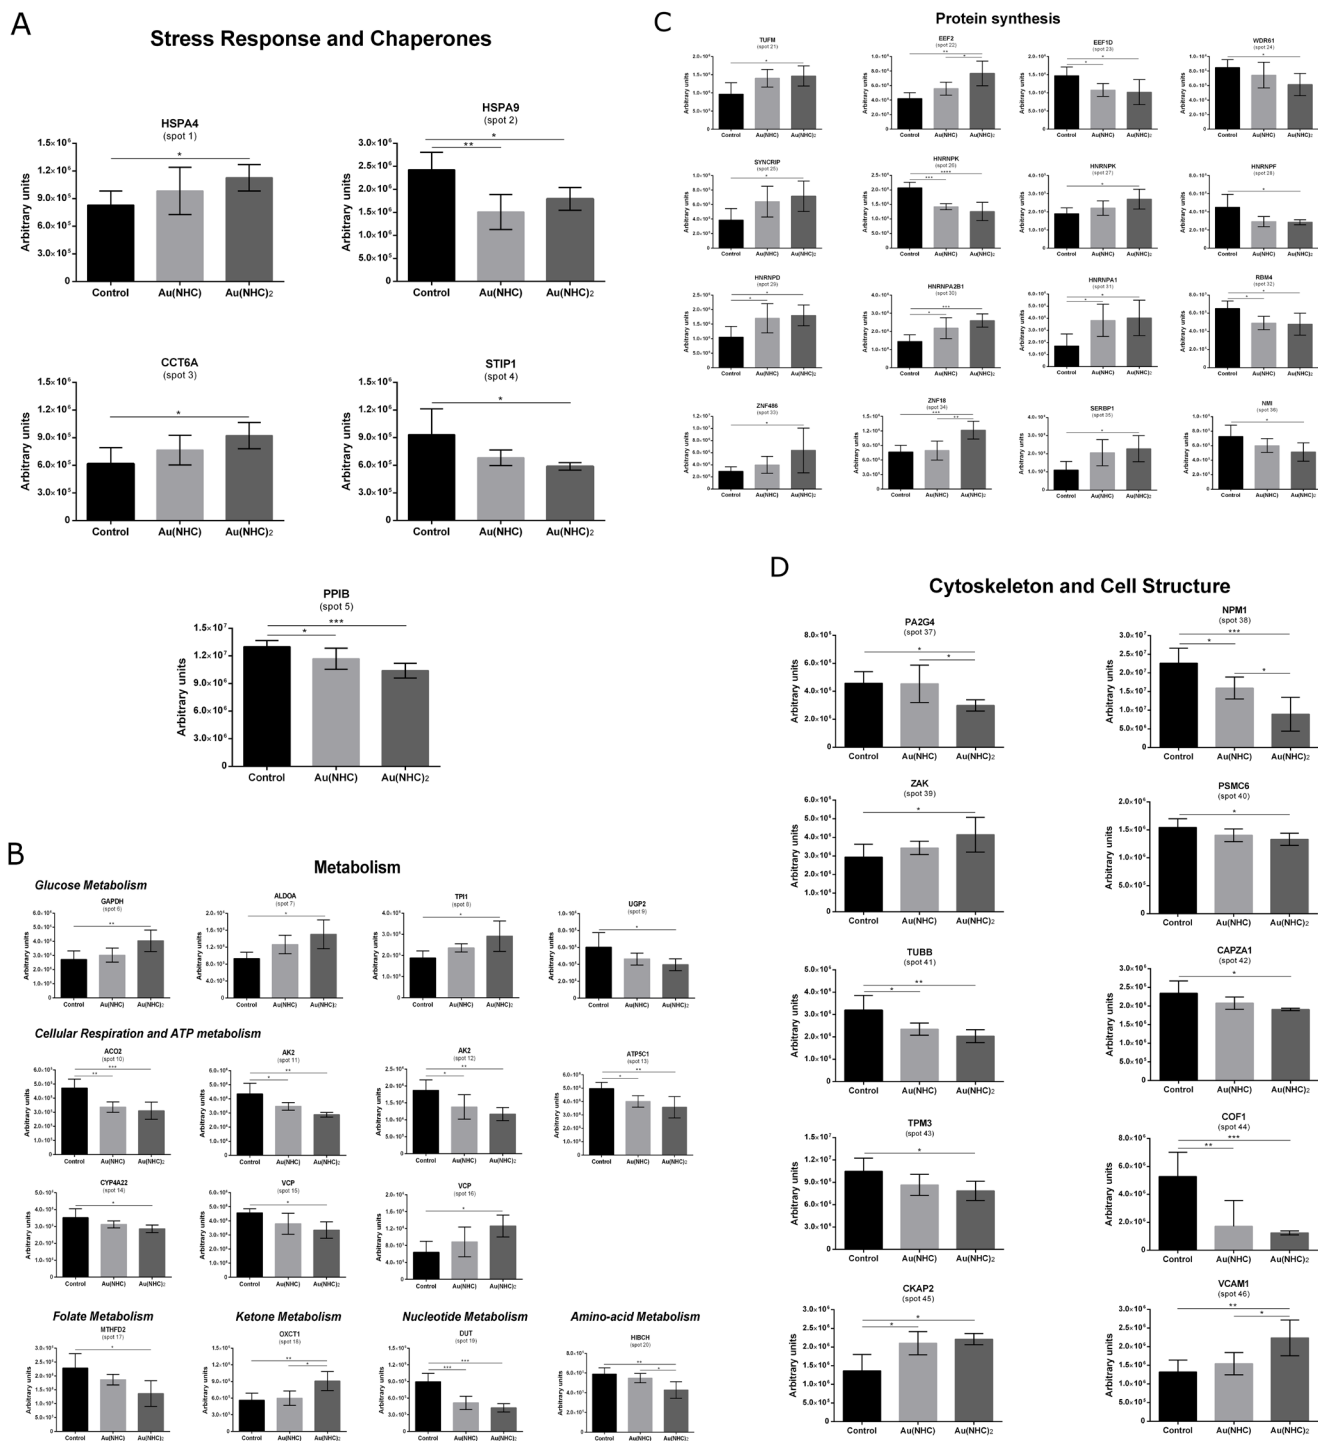

**Supplementary Figure 3: Quantitative analysis of the 51 differentially expressed protein spots identified by mass spectrometry.** (A) Stress Response and Chaperones; (B) Metabolism; (C) Protein synthesis; (D) Cytoskeleton and Cell Structure; (E) Cell redox homeostasis, Transport, DNA replication and repair. Histograms represent the abundance of each spot (normalized volume, arbitrary units) in A2780 control, Au(NHC)- and Au(NHC)<sub>2</sub>-treated cells. ANOVA test was performed by Progenesis SameSpots 4.0 software (Nonlinear Dynamic, UK) to determine if the relative change was statistically significant (p-value<0.05). All spots show a q-value (False Discovery Rate) <0.1. The significant differences between groups were calculated with GraphPad Prism6.0 software, using Tukey correction for multiple comparison (see Table 2). (\*p<0.05), (\*\*p<0.01), (\*\*\*)p<0.001, (\*\*\*\*)p<0.0001). For details, see Materials and Methods.

**Supplementary Table 1: MS/MS analysis of differentially expressed protein spots identified by MALDI-TOF/TOF MS with a PMF score  $\leq 70$**

| Spot No <sup>a</sup>                   | Protein name                                           | Gene Name | AC <sup>b</sup> | Observed Theoretical     |              | Mascot search results  |                            |               |                          | Peptide Identified                                                  |
|----------------------------------------|--------------------------------------------------------|-----------|-----------------|--------------------------|--------------|------------------------|----------------------------|---------------|--------------------------|---------------------------------------------------------------------|
|                                        |                                                        |           |                 | Mr(kDa)/ pI <sup>c</sup> | Mr (kDa)/ pI | PMF score <sup>d</sup> | Matched Pept. <sup>e</sup> | Seq. Coverage | MS/MS score <sup>g</sup> |                                                                     |
| <b>Stress Response and Chaperones</b>  |                                                        |           |                 |                          |              |                        |                            |               |                          |                                                                     |
| 1                                      | Heat shock 70 kDa protein 4                            | HSPA4     | P34932          | 94.2/5.1                 | 95.1/5.1     | 62                     | 7/15                       | 11            | 50                       | [391 – 405] R.EFSITDVVPYPISLR.W<br>[574 – 591] K.TSTVDLPIENQLLWQIDR |
| 2                                      | Stress-70 protein, mitochondrial                       | HSPA9     | P38646          | 63.0/5.2                 | 73.9/5.9     | 62                     | 6/13                       | 12            | 70                       | [499 – 513] K.LLGQFTLIGIPPAPR.G                                     |
| <b>Metabolism</b>                      |                                                        |           |                 |                          |              |                        |                            |               |                          |                                                                     |
| 7                                      | Fructose-bisphosphate aldolase A                       | ALDOA     | P04075          | 35.1/7.5                 | 39.8/8.3     | 69                     | 8/26                       | 29            | 57<br>46                 | [88 – 99] K.ADDGRFPQVIK.S<br>[244 – 258] K.FSHEEIAMATVTALR.R        |
| 11                                     | Adenylate kinase 2, mitochondrial                      | AK2       | P54819          | 28.9/7.5                 | 26.7/7.7     | 62                     | 6/24                       | 25            | 62                       | [94 – 103] K.NGFLLDGFPR.T                                           |
| 12                                     | Adenylate kinase 2, mitochondrial                      | AK2       | P54819          | 28.9/7.6                 | 26.7/7.7     | 62                     | 6/26                       | 25            | 51                       | [187 – 202] R.LQAYHTQTTPLEIYYR.K                                    |
| 13                                     | ATP synthase subunit gamma, mitochondrial              | ATP5C1    | P36542          | 26.3/7.5                 | 33.0/9.2     | 62                     | 6/28                       | 15            | 74                       | [127 – 138] K.EVMLVGIGDKIR.G                                        |
| 14                                     | Cytochrome P450 4A22                                   | CYP4A22   | Q5TCH4          | 39.2/6.8                 | 59.7/9.2     | 59                     | 7p/22                      | 15            | 82<br>75                 | [34 – 46] K.AAQLYLHRQWLLK.A<br>[378 – 391] K.EALRLYPPVPGIGR.E       |
| <b>Protein synthesis</b>               |                                                        |           |                 |                          |              |                        |                            |               |                          |                                                                     |
| 23                                     | Elongation factor 1-delta                              | EEF1D     | P29692          | 39.2/4.7                 | 31.2/4.9     | 58                     | 6/32                       | 30            | 66                       | [60 – 83] K.SLAGSSGPGASSGTSGDHGLVVR.I                               |
| 30                                     | Heterogeneous nuclear ribonucleoproteins A2/B1         | HNRNPA2B1 | P22626          | 32.2/7.4                 | 37.5/8.9     | 66                     | 7/27                       | 18            | 58<br>61                 | [23 – 38] K.LFIGGLSFETTEESLR.N<br>[130 – 137] R.DYFEEYGK.I          |
| 33                                     | Zinc finger protein 486                                | ZNF486    | Q96H40          | 54.1/8.1                 | 55.1/9.3     | 66                     | 8/28                       | 22            | 49<br>56                 | [7 – 16] R.SLEMESLQFR.D<br>[138 – 152] R.GYNGLNQCLTTTQSK.I          |
| 34                                     | Zinc finger protein 18                                 | ZNF18     | P17022          | 48.6/5.3                 | 62.3/5.7     | 66                     | 8p/57                      | 20            | 70                       | [281 – 290] K.IPRPTCIGDR.Q                                          |
| 35                                     | Plasminogen activator inhibitor 1 RNA-binding protein  | SERBP1    | Q8NC51          | 54.1/8.6                 | 45.0/8.7     | 66                     | 9/26                       | 25            | 88                       | [112 – 122] R.RPDQQLQGEGK.I                                         |
| <b>Cytoskeleton and Cell Structure</b> |                                                        |           |                 |                          |              |                        |                            |               |                          |                                                                     |
| 39                                     | Mitogen-activated protein kinase kinase MLT (fragment) | ZAK       | Q9NYL2          | 23.1/7.3                 | 91.2/7.9     | 60                     | 9/41                       | 17            | 65                       | [355 – 369] K.GDSSAEMSVYASLFK.E                                     |
| 43                                     | Tropomyosin alpha-3 chain                              | TPM3      | P06753          | 33.2/4.6                 | 32.9/4.7     | 70                     | 6/16                       | 14            | 100<br>92                | [93 – 102] R.IQLVEEELDR.A<br>[170 – 179] K.LVIEGDLER.T              |
| 46                                     | Vascular cell adhesion protein 1 (fragment)            | VCAM1     | P19320          | 31.9/5.2                 | 82.3/5.1     | 63                     | 6/15                       | 16            | 75                       | [443 – 459] K.GETILENIEFLEDTDMK.S                                   |
| <b>Transport</b>                       |                                                        |           |                 |                          |              |                        |                            |               |                          |                                                                     |
| 49                                     | Oxysterol-binding protein-related protein 1 (fragment) | OSBPL1A   | Q9BXW6          | 46.1/4.7                 | 109.8/5.9    | 57                     | 7/13                       | 8             | 59                       | [519 – 531] K.DCGGGDALSNQIK.K                                       |
| <b>DNA replication and repair</b>      |                                                        |           |                 |                          |              |                        |                            |               |                          |                                                                     |
| 51                                     | Single-stranded DNA-binding protein, mitochondrial     | SSBP      | Q04837          | 15.2/8.2                 | 17.2/9.6     | 70                     | 6/23                       | 37            | 75<br>91                 | [52 – 66] K.NPVTIFSLATNEMWR.S<br>[87 – 95] R.ISVFRPGLR.D            |

The complete list of the identified protein spots is reported in Table 2.

<sup>a</sup> Spot numbers match those reported in the representative 2-DE images shown in Figure 4A.

<sup>b</sup> Accession number in Swiss-Prot/UniProtKB (<http://www.uniprot.org/>).

<sup>c</sup> Observed Mr/pI, based on the calculation using Progenesis SameSpots 4.0 software

<sup>d</sup> MASCOT PMF (Peptide Mass Fingerprint) score (Matrix Science, London, UK; <http://www.matrixscience.com>). MS matching score greater than 56 was required for a significant MS hit ( $p$ -value<0.05).

<sup>e</sup> Number of matched peptides correspond to peptide masses matching the top hit from Ms-Fit PMF, searched peptides are also reported.

<sup>f</sup> Sequence coverage = (number of the identified residues/total number of amino acid residues in the protein sequence) x100%.

<sup>g</sup> MASCOT MS/MS score (Matrix Science, London, UK; <http://www.matrixscience.com>). Ion score greater than 25 was significant ( $p$ -value<0.05).

**Supplementary Table 2: Overrepresentation Enrichment Analysis (ORA) of GO terms and pathways obtained from the identified protein list, using Webgestalt functional enrichment analysis web tool (<http://www.webgestalt.org/option.php>).**

**See Supplementary File 1**
